# Supplementary material
Source: Springer Nature journal article supplement (https://www.springerprofessional.de/resource/supplementary/13638_2011_473_MOESM10_ESM.pdf/11897796)
Supplement: MOESM10 [file 11897796]

First half users

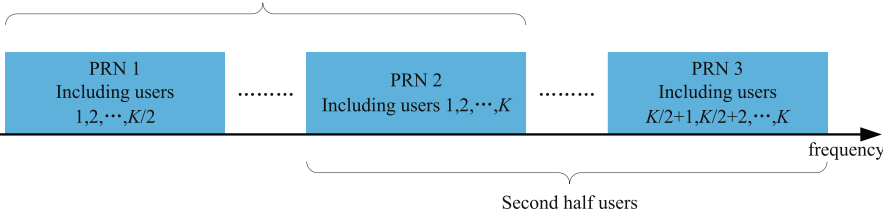

PRN 1  
Including users  
 $1, 2, \dots, K/2$

$\dots$

PRN 2  
Including users  $1, 2, \dots, K$

$\dots$

PRN 3  
Including users  
 $K/2+1, K/2+2, \dots, K$

frequency

Second half users
